# Supplementary material
Source: Springer Nature journal article supplement (https://www.springermedizin.de/resource/supplementary/13011_2012_217_MOESM2_ESM.pdf/9628668)

### Males

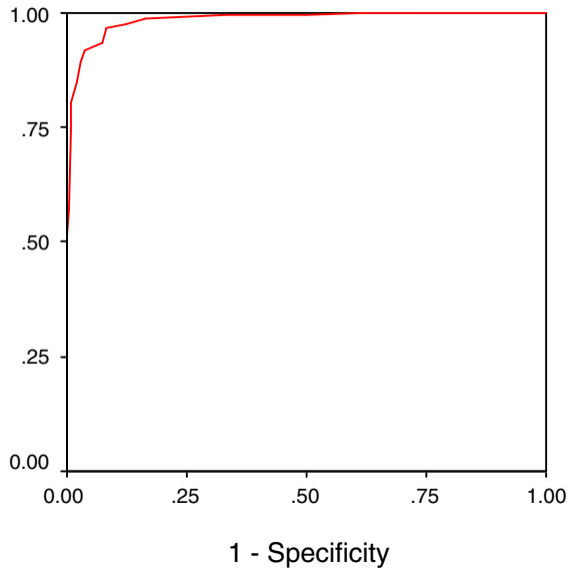

### Females

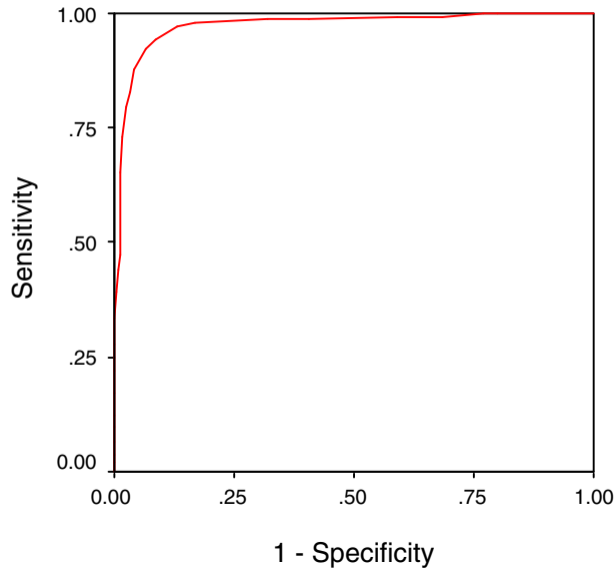

Supplement: MOESM2 [file 9628668]
